# Supplementary material for: Nonclassical action of Ku70 promotes Treg-suppressive function through a FOXP3-dependent mechanism in lung adenocarcinoma
Source: PubMed Central journal article supplement (PMC11601948; doi:10.1172/jci178079), 2024-10-24

Full unedited gel for Figure 5A

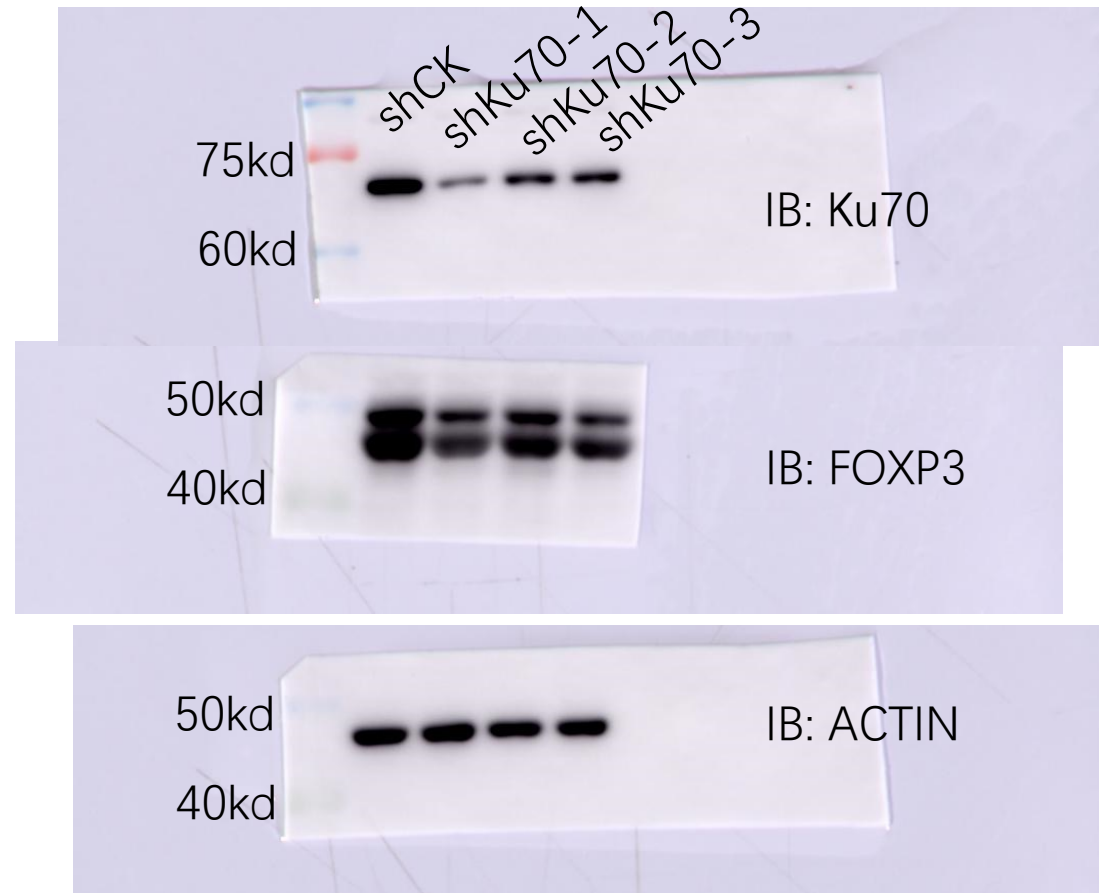

# Full unedited gel for Figure 6A

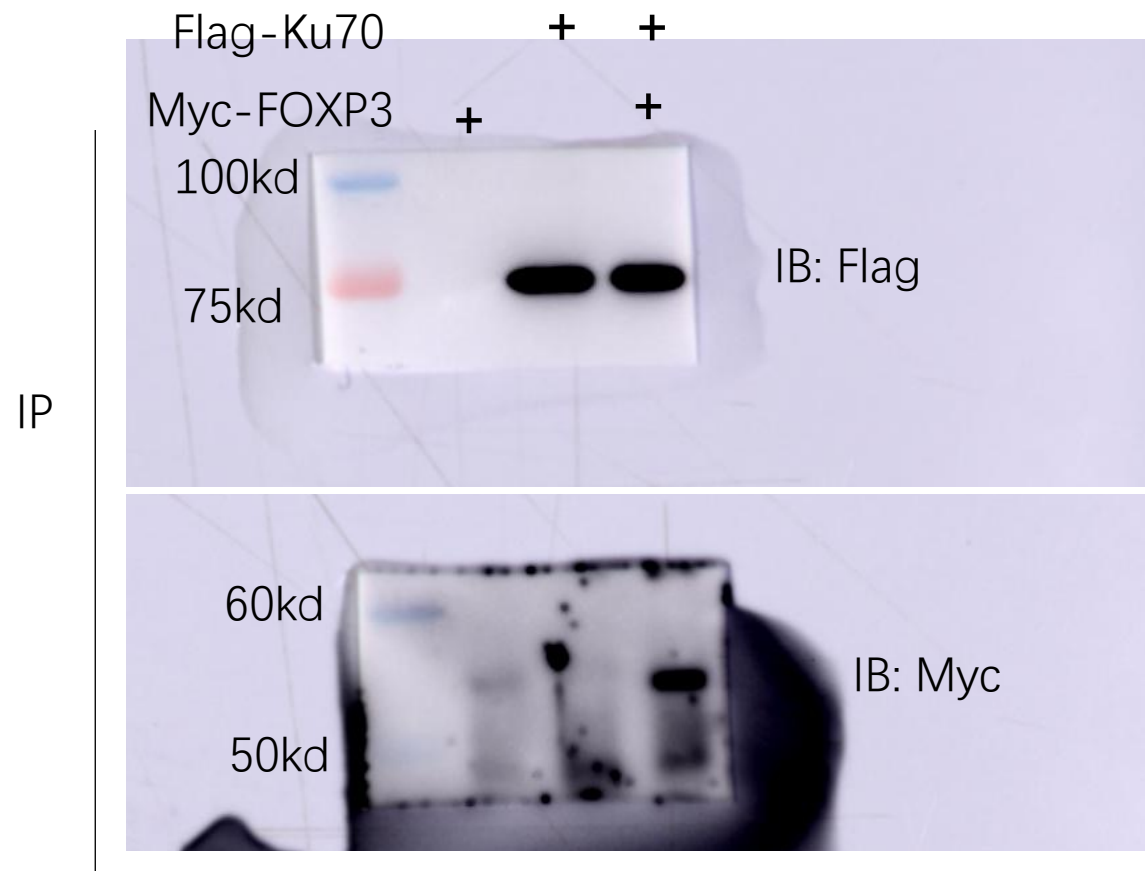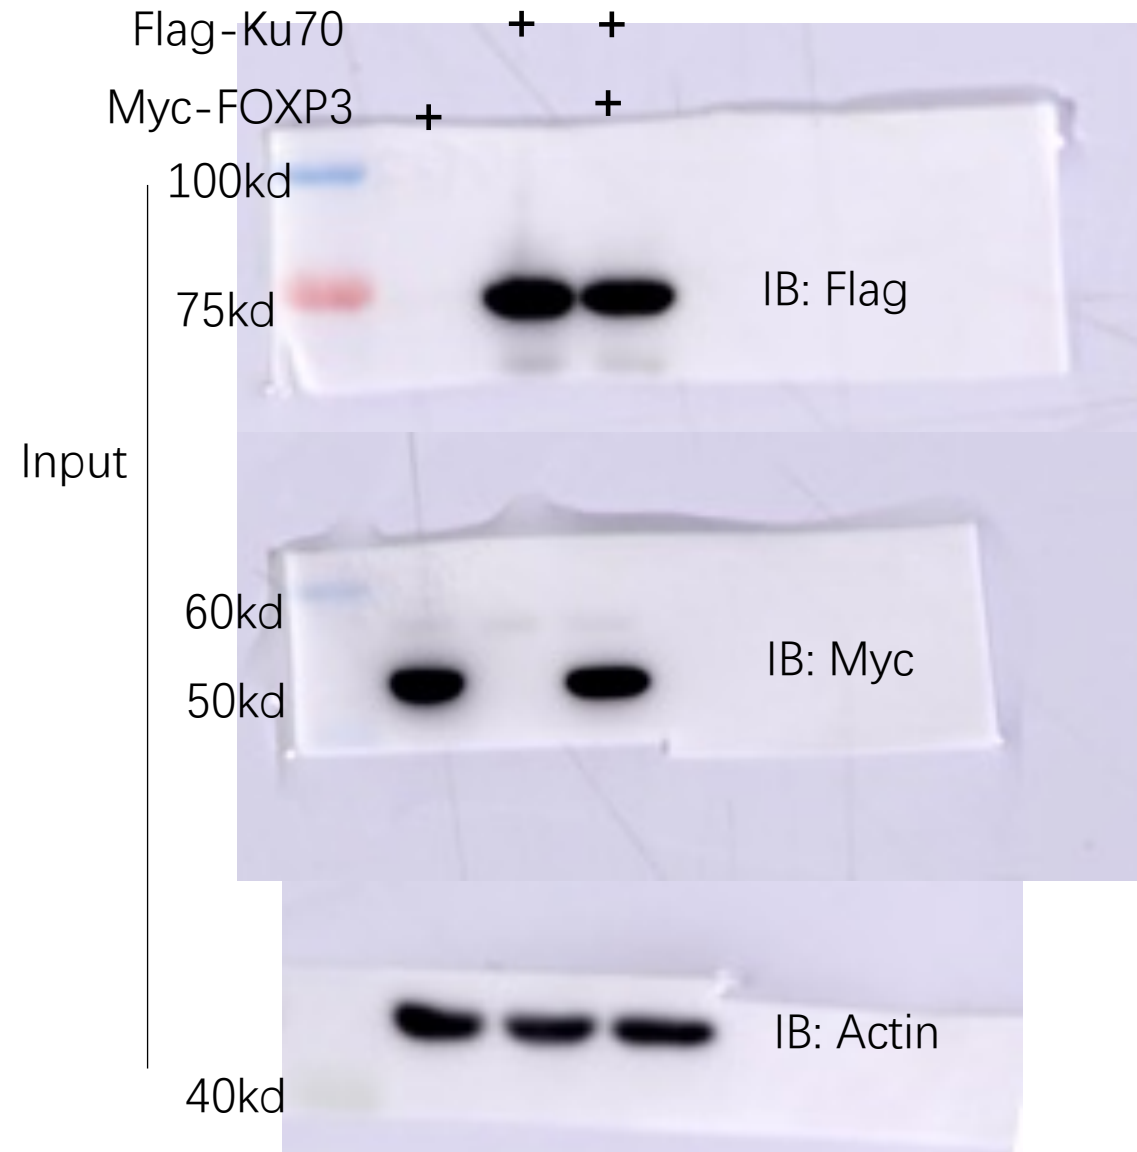

# Full unedited gel for Figure 6B

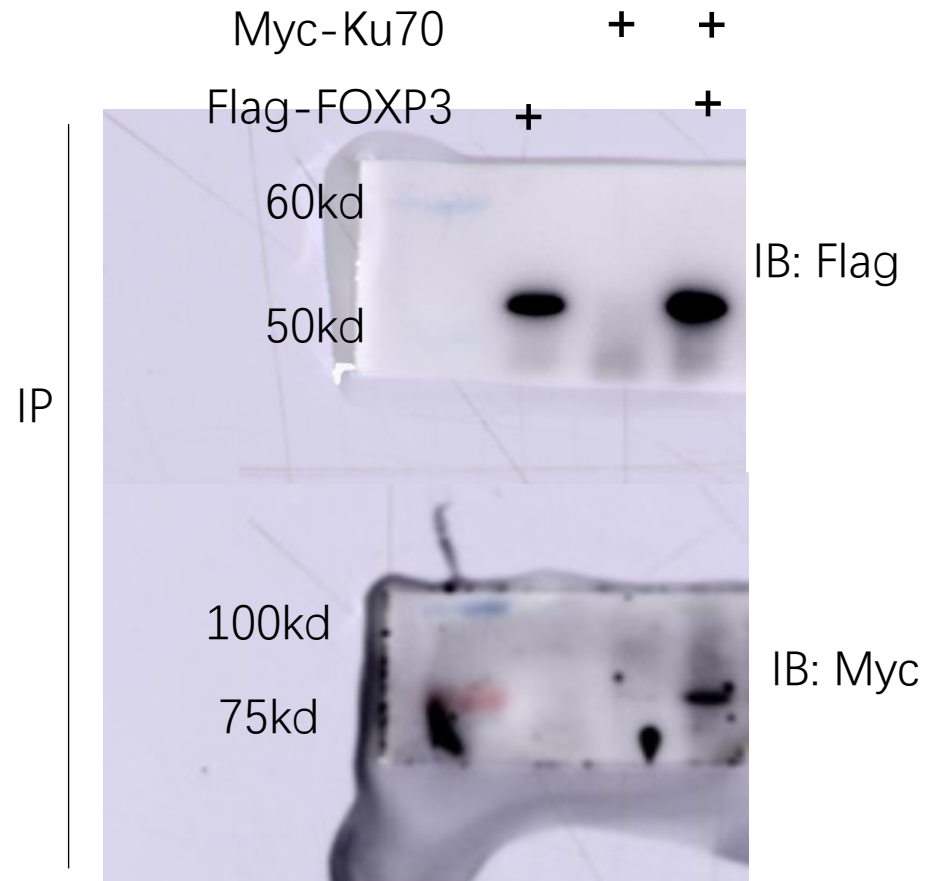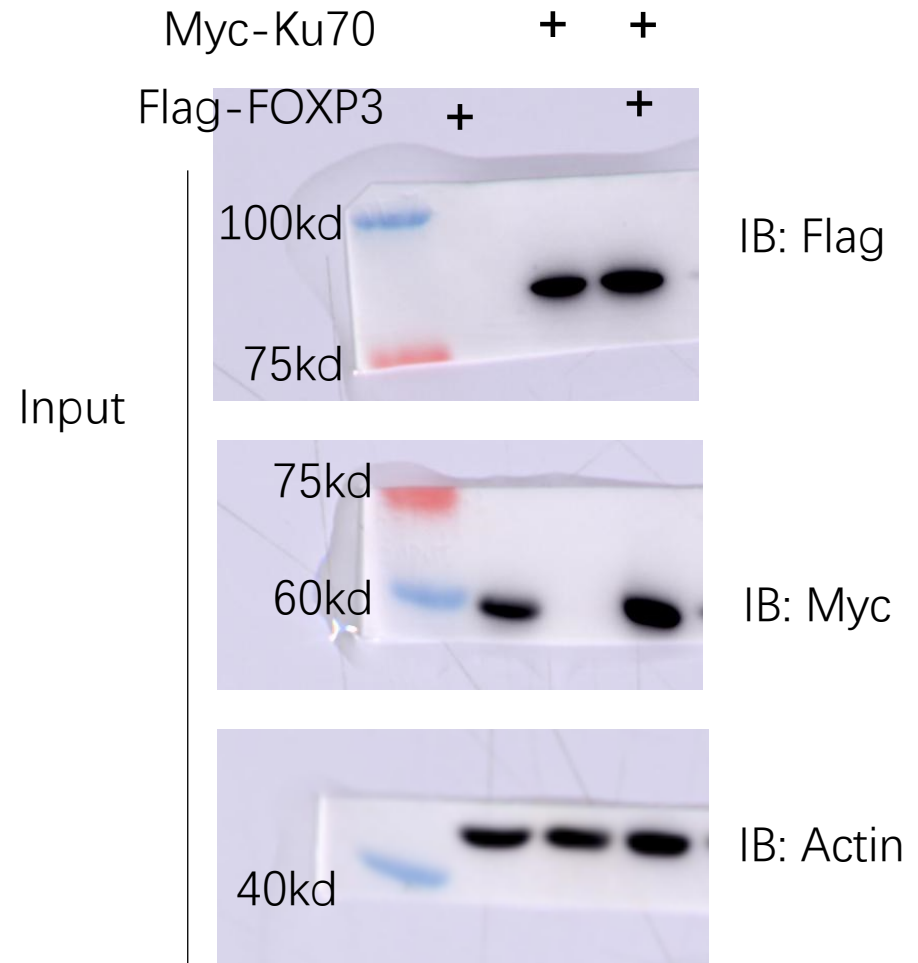

Full unedited gel for Figure 6C

IP

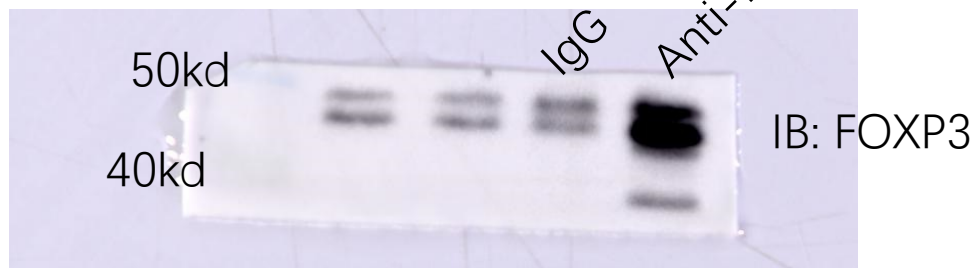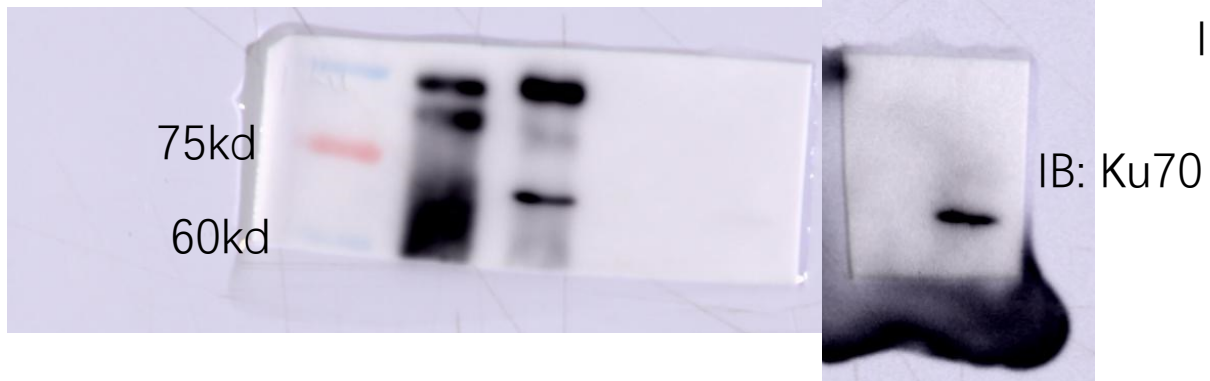

IP

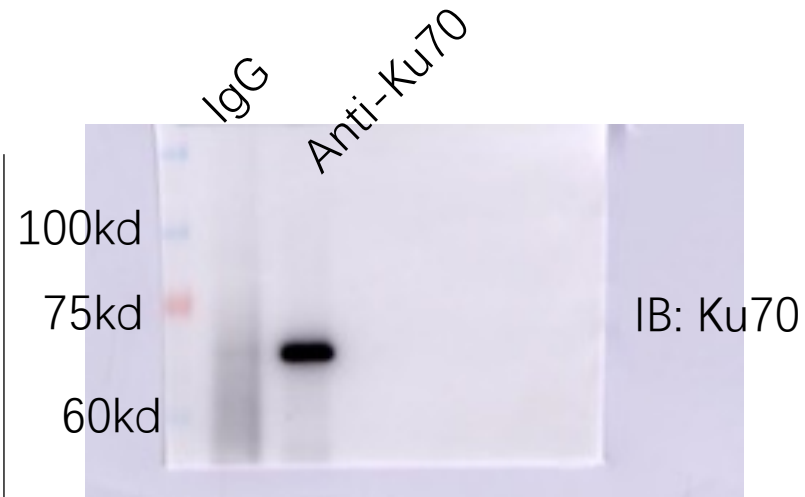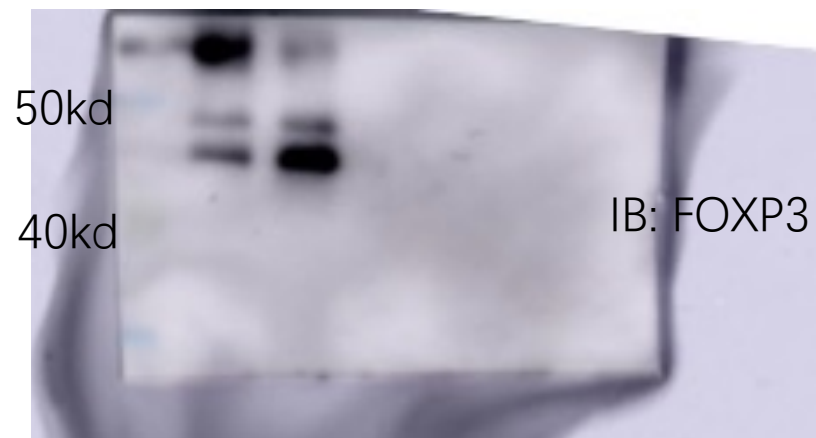

Input

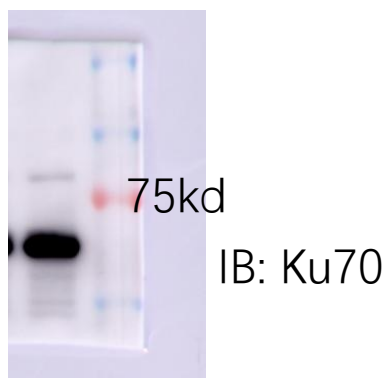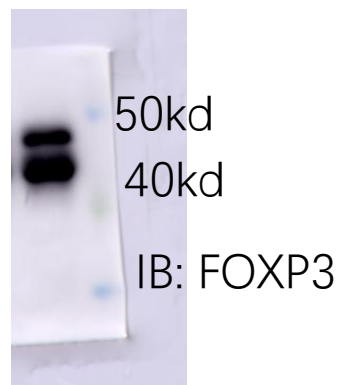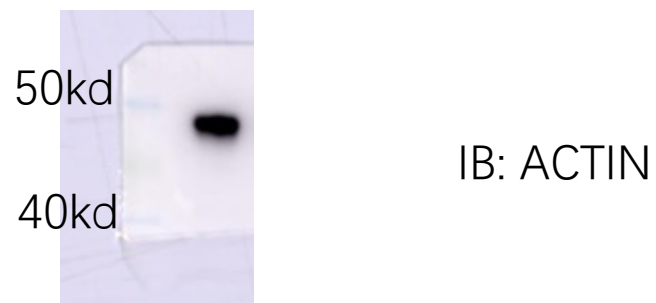

# Full unedited gel for Figure 6E

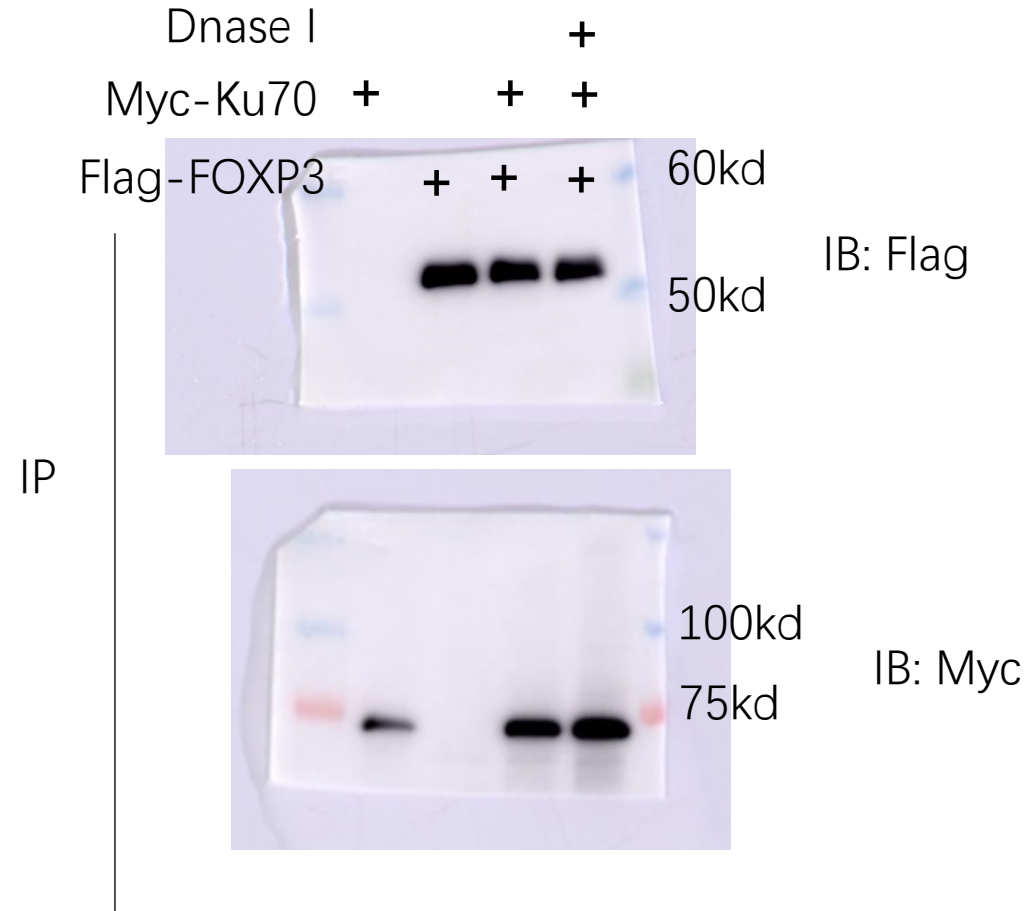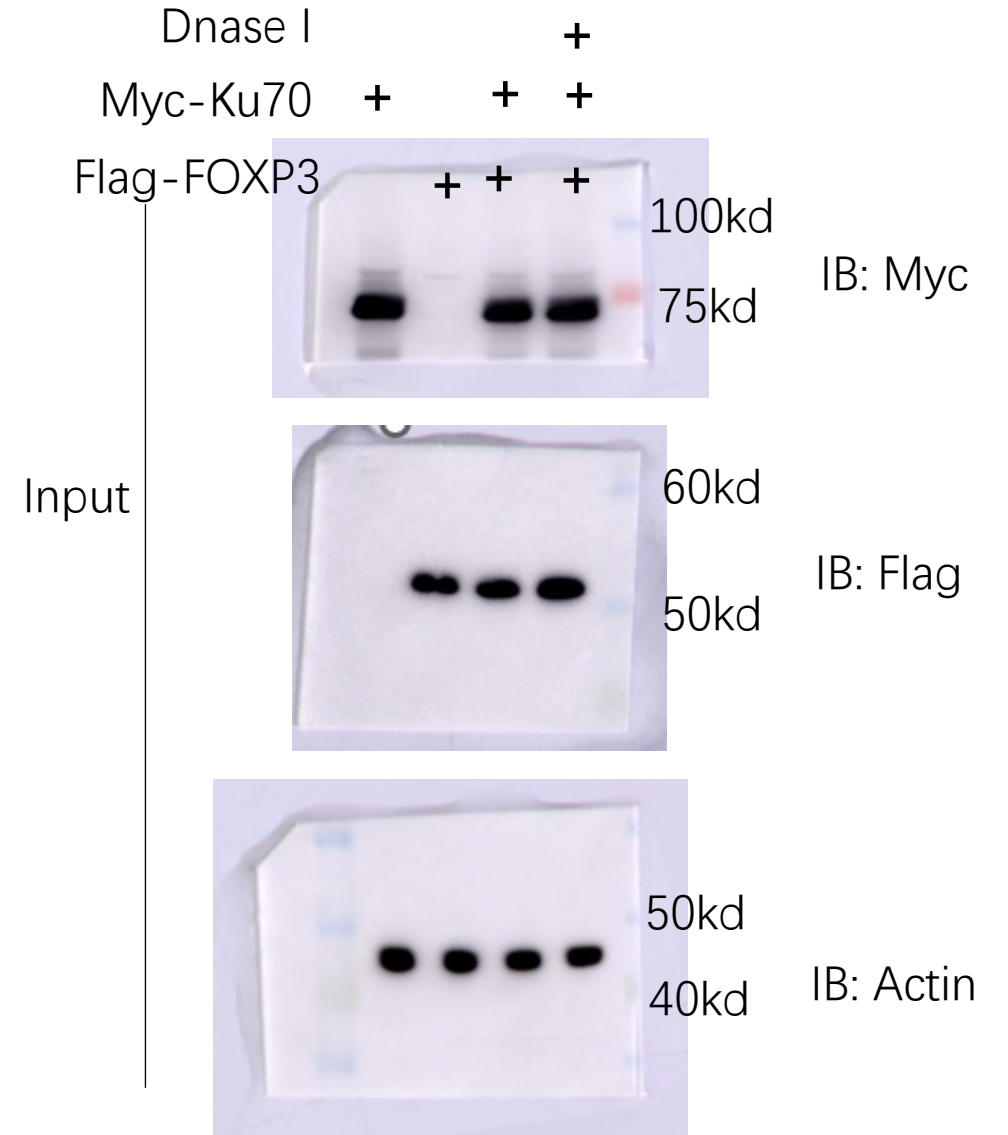

Full unedited gel for Figure 6F

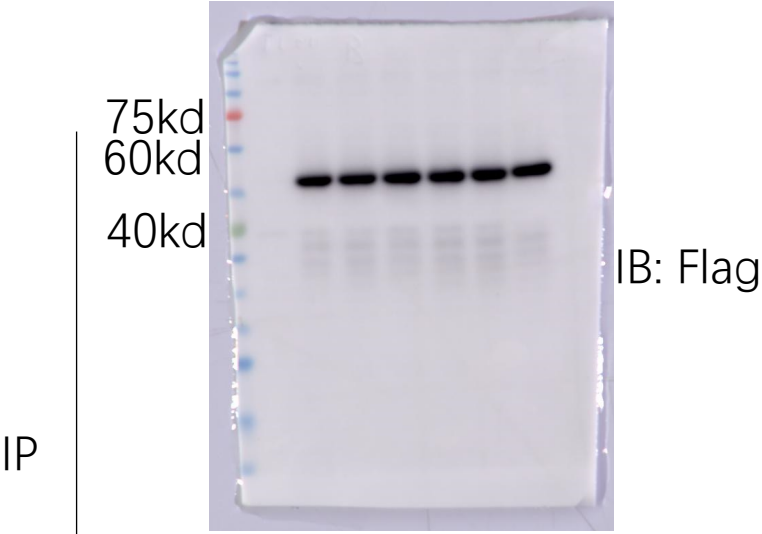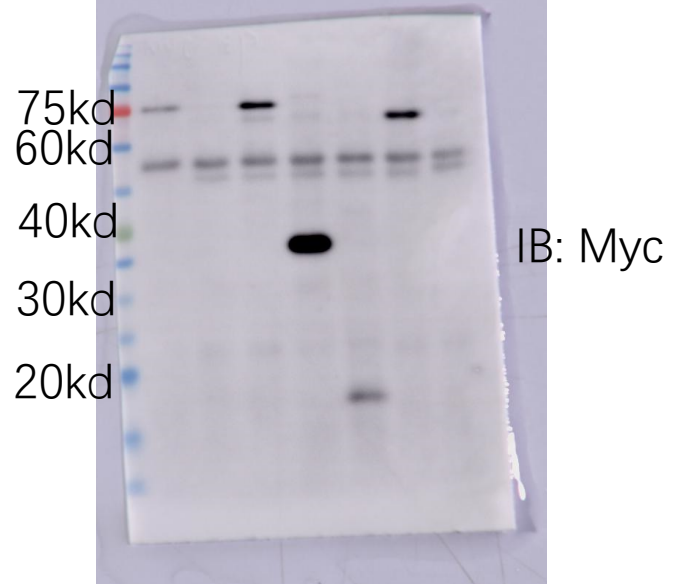

Input

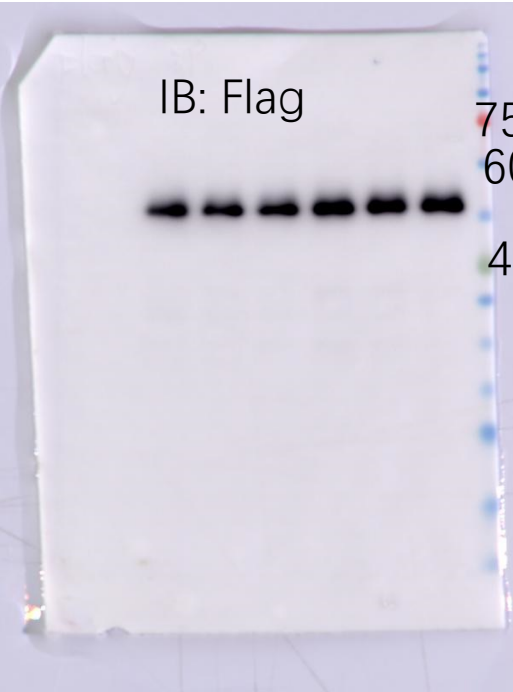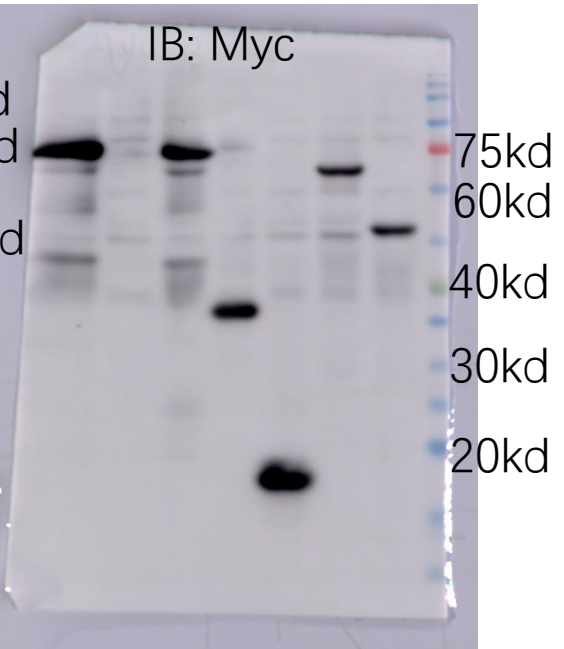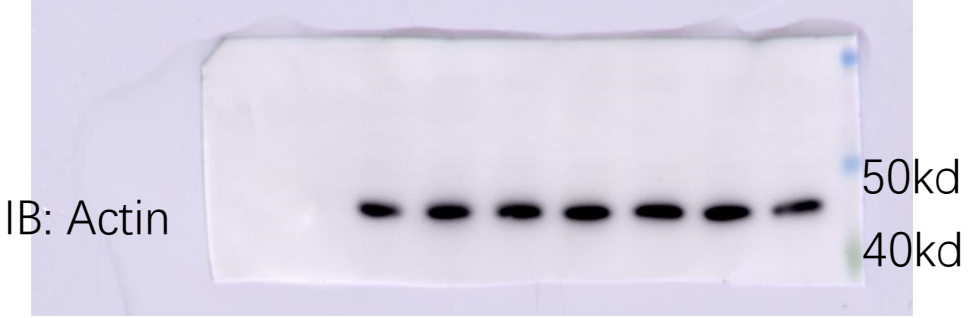

# Full unedited gel for Figure 6G

| Myc-FOXP3 | FL | FL | N1 | N2 | C1 | C2 | C3 | C4 |
|-----------|----|----|----|----|----|----|----|----|
| Flag-Ku70 | +  | +  | +  | +  | +  | +  | +  | +  |

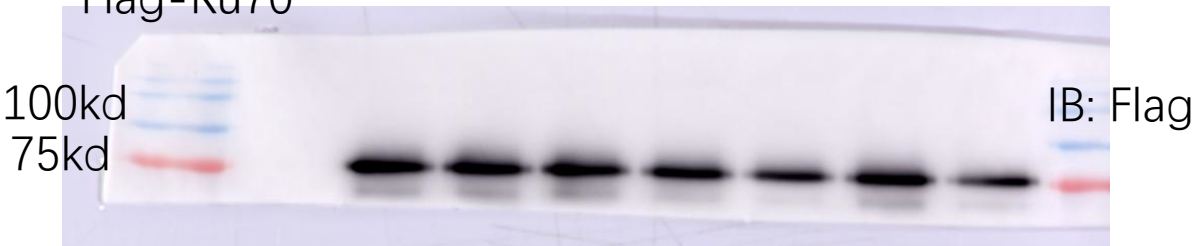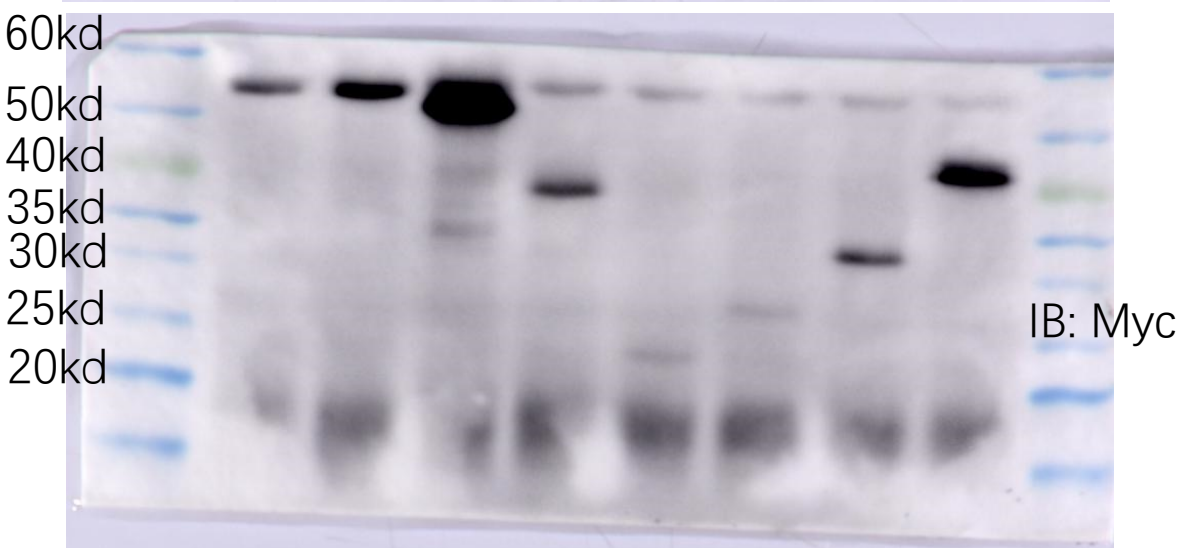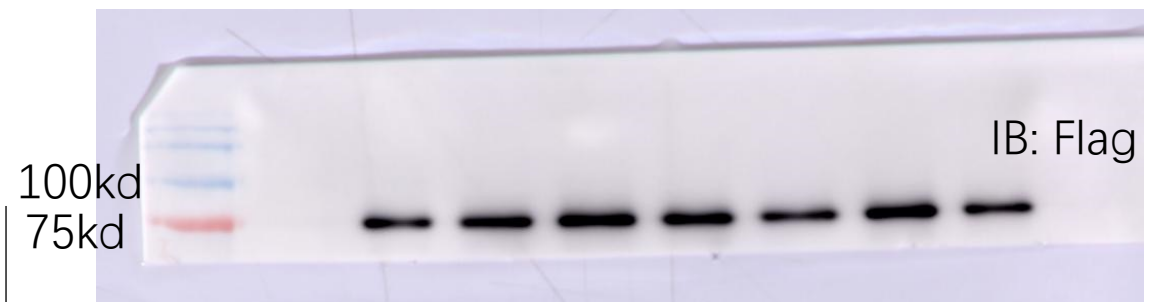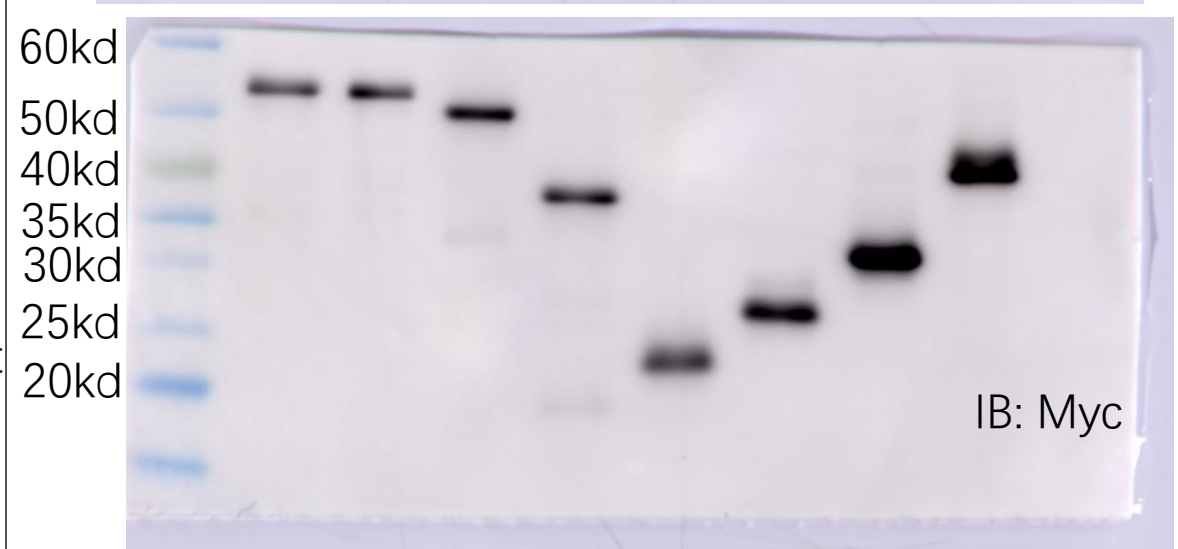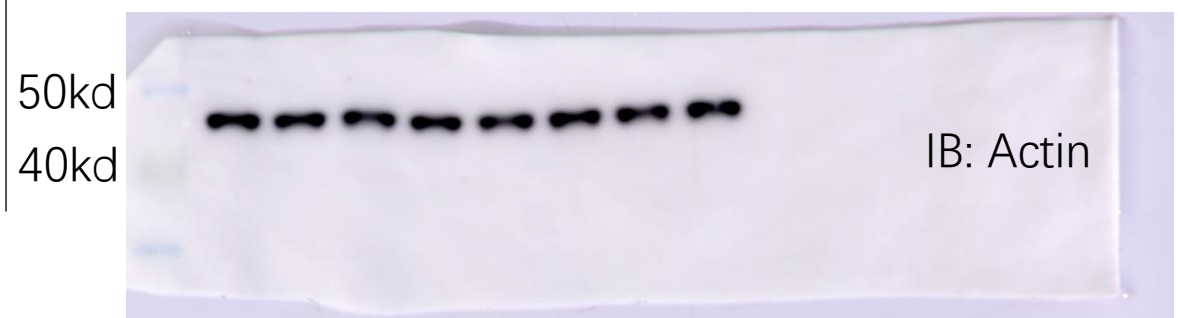

Input

# Full unedited gel for Figure 6H

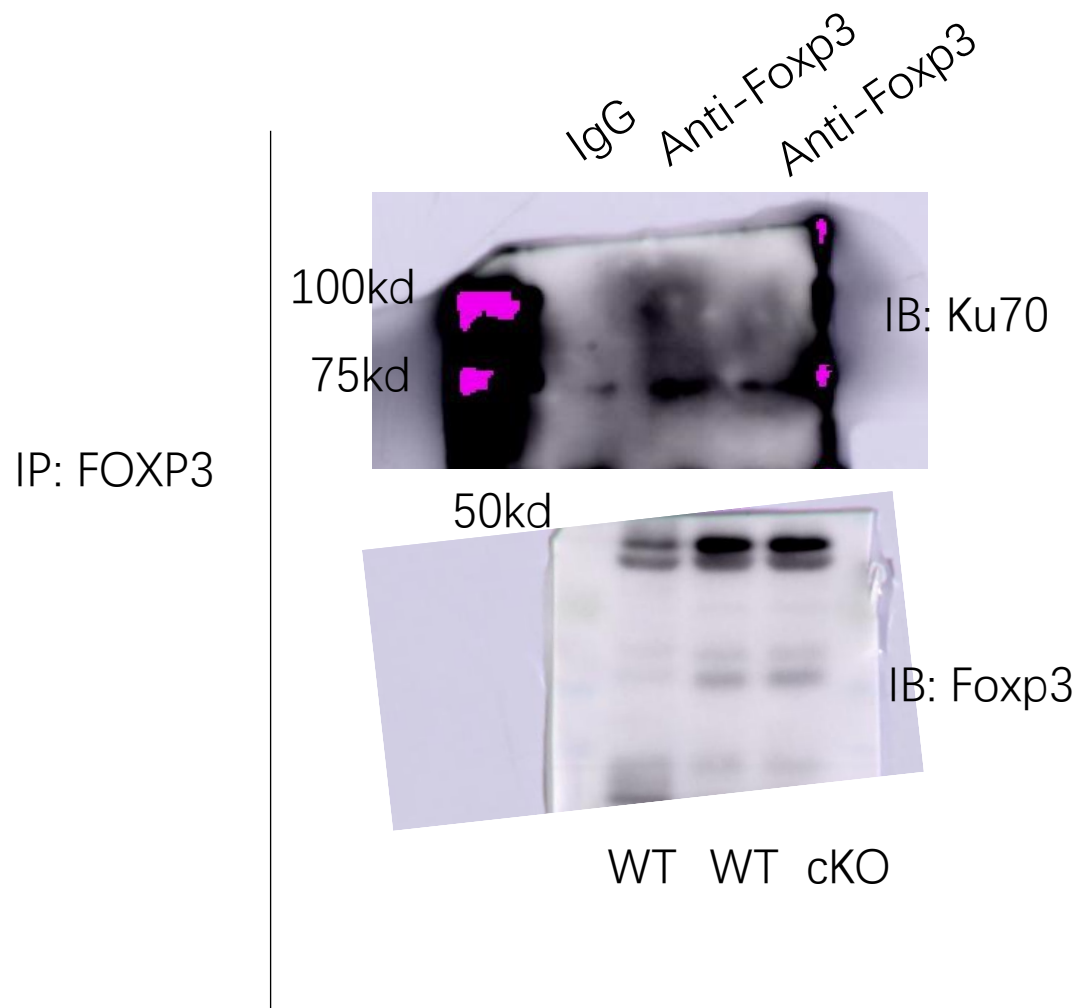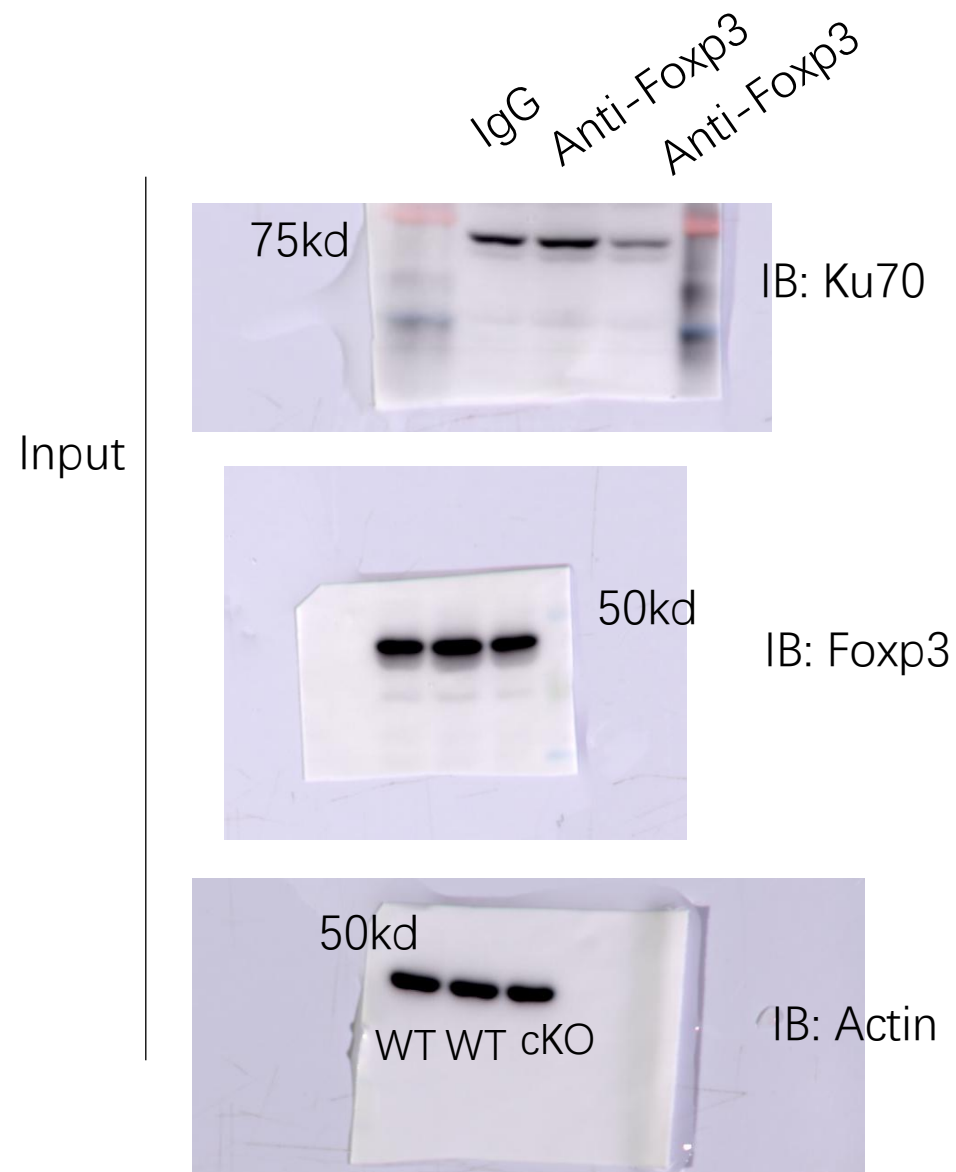



# Full unedited gel for supplemental Figure 2B

| Treg |     | Tconv |     |
|------|-----|-------|-----|
| WT   | cKO | WT    | cKO |

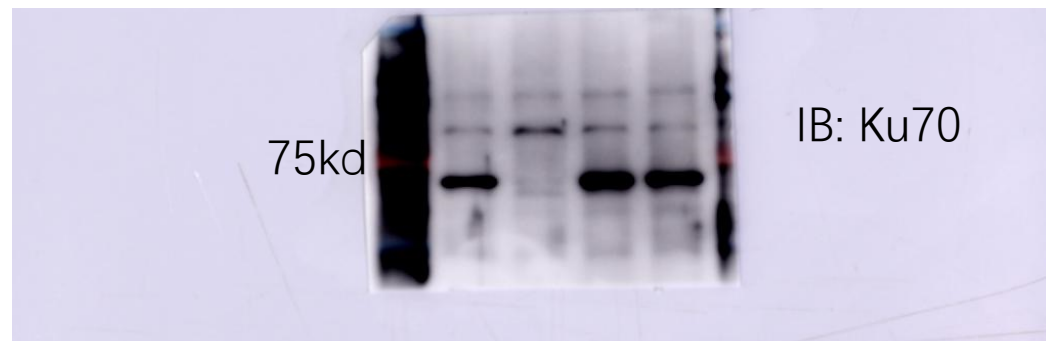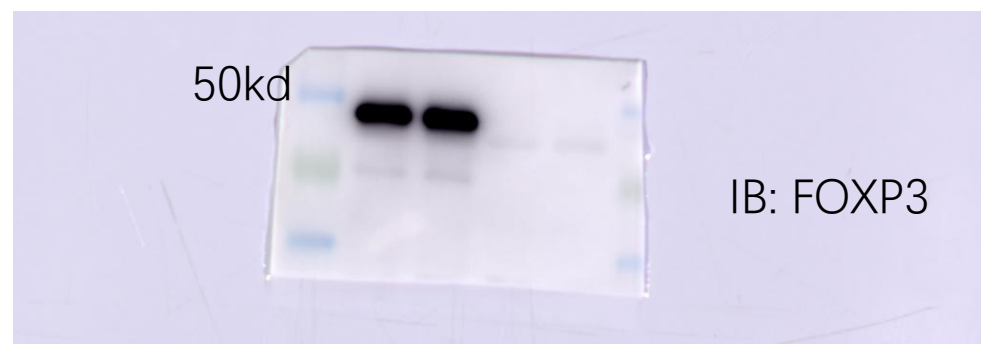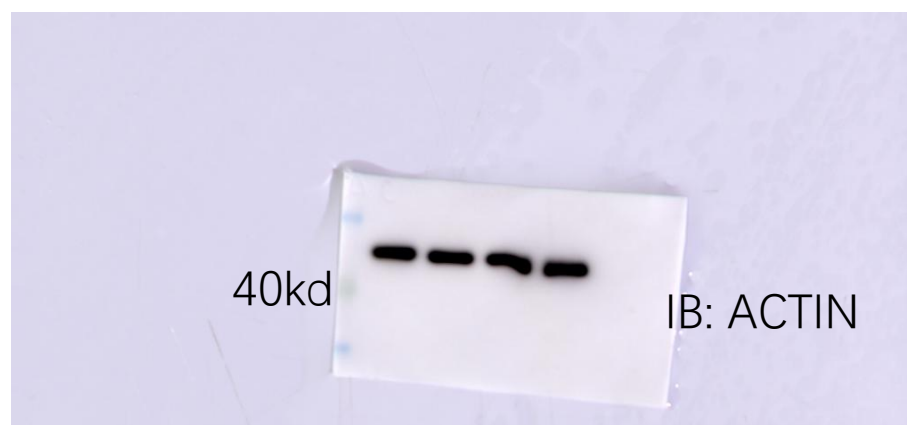

Full unedited gel for supplemental Figure 7A

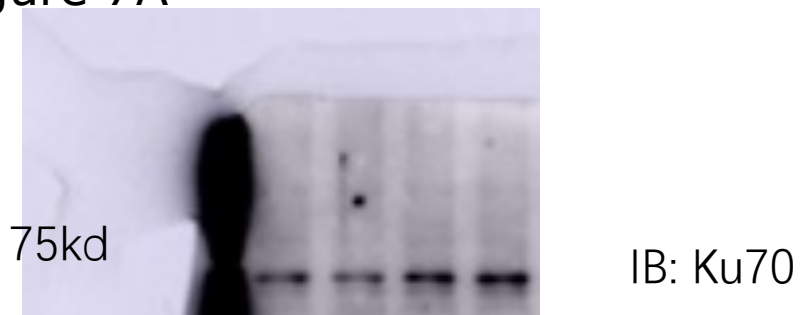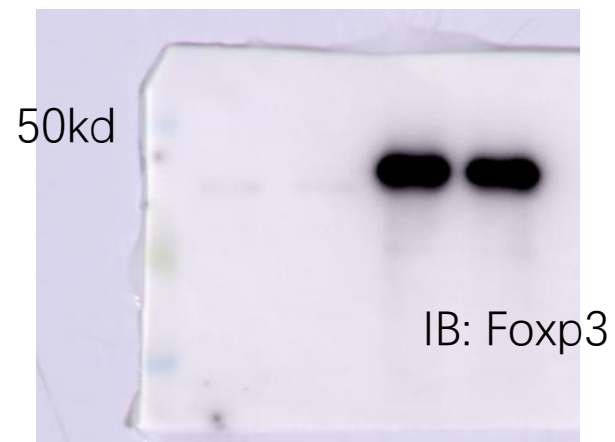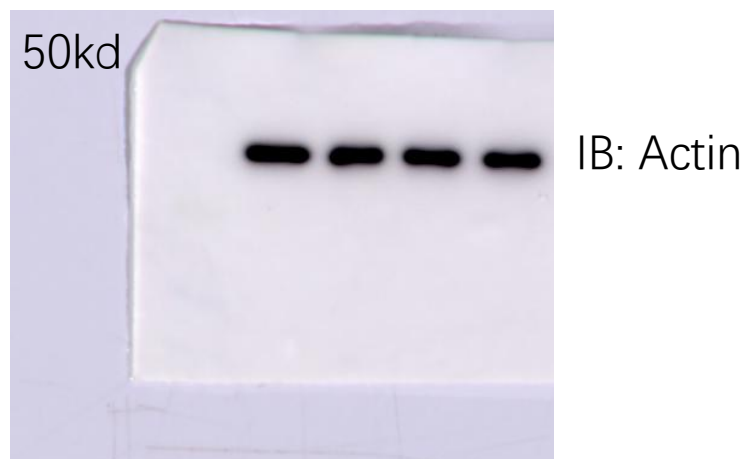

Supplement: jci-134-178079-s009.pdf [file jci-134-178079-s009.pdf]
